# Supplementary figures and images for: Production and characterization of virus-free, CRISPR-CAR T cells capable of inducing solid tumor regression
Source: HighWire-hosted journal article supplement (doi:10.1136/jitc-2021-004446), 2022-09-01

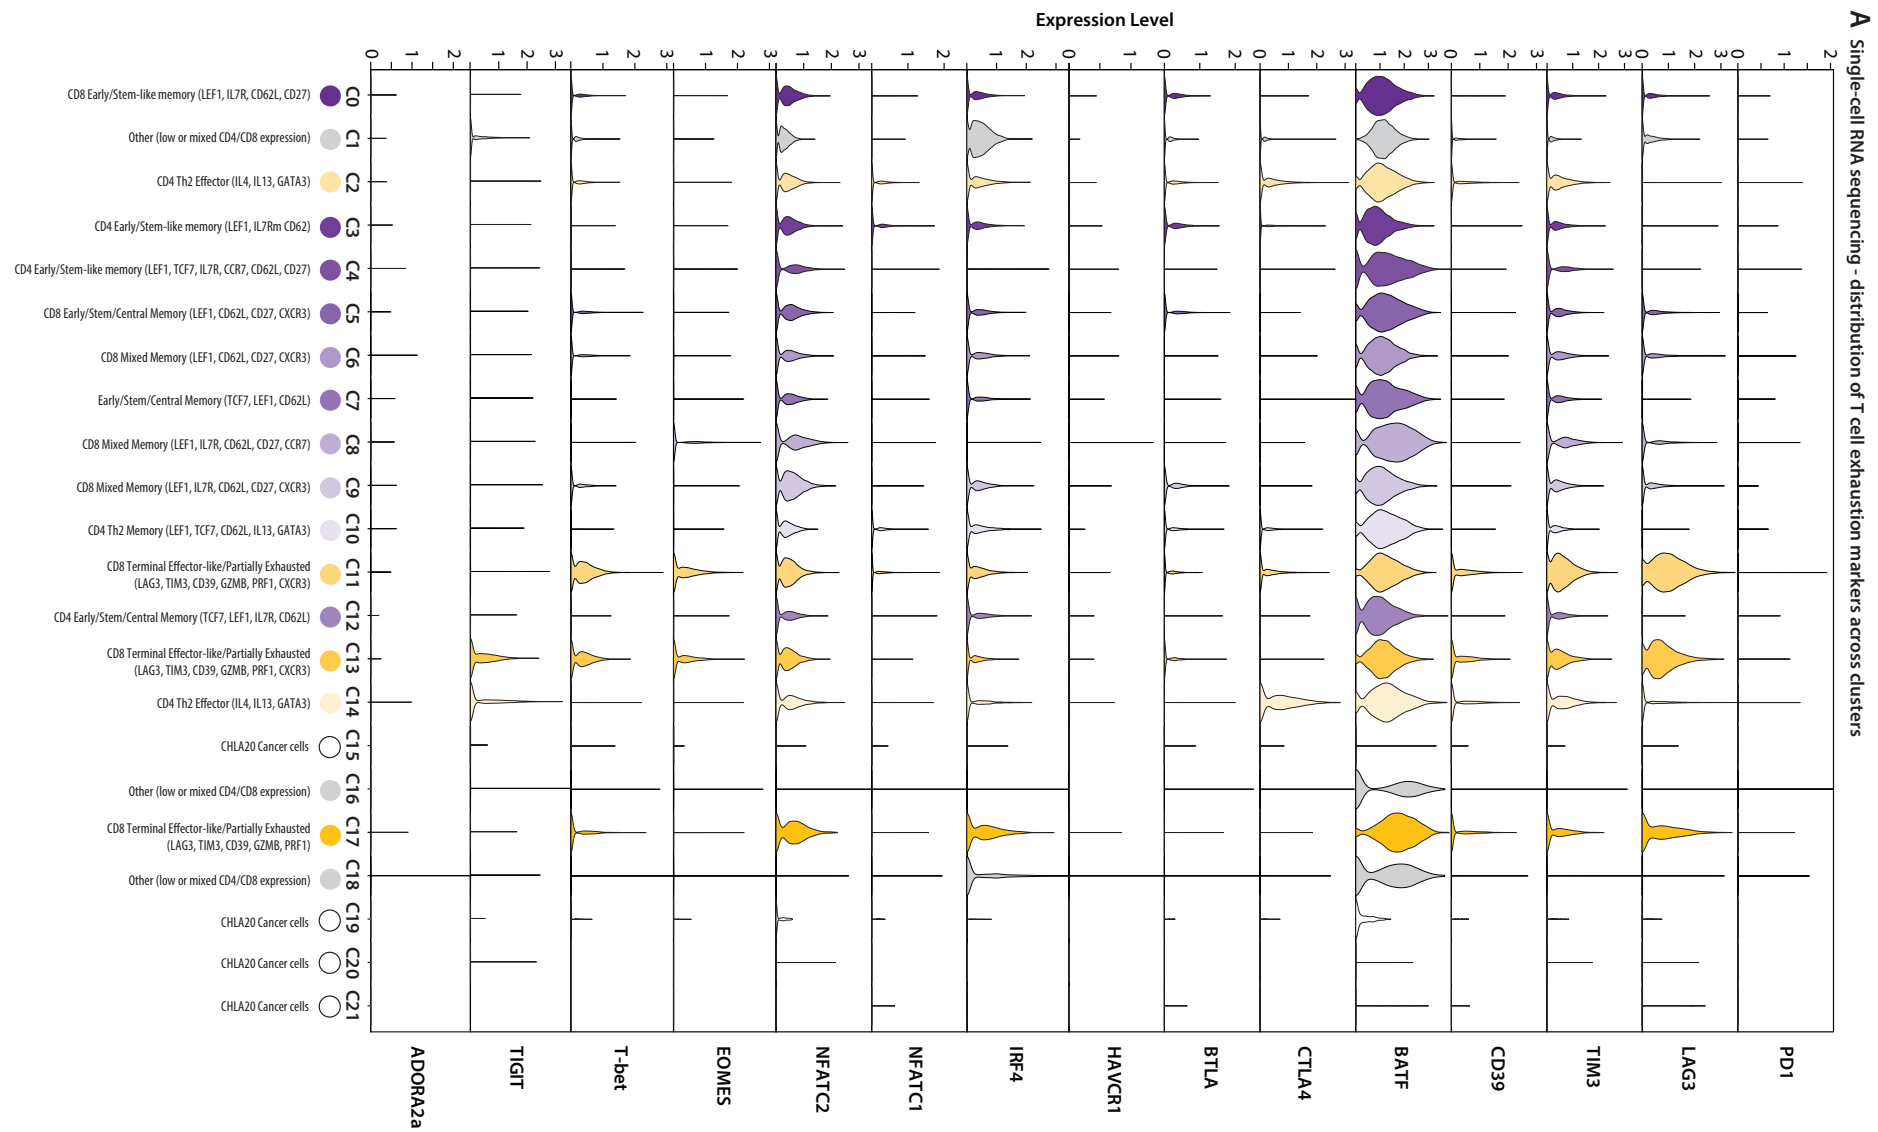

Supplement: jitc-2021-004446supp009_data_supplement.pdf [file jitc-2021-004446supp009_data_supplement.pdf]
